# Supplementary material for: A Highly Active Porous Mo2C-Mo2N Heterostructure on Carbon Nanowalls/Diamond for a High-Current Hydrogen Evolution Reaction
Source: MDPI journal article supplement (doi:10.3390/nano14030243), 2024-01-23
Supplement: s1 [file s1]

## Supplementary Materials

# A Highly Active Porous Mo<sub>2</sub>C-Mo<sub>2</sub>N Heterostructure on Carbon Nanowalls/Diamond for a High-current Hydrogen Evolution Reaction

Zhaofeng Zhai <sup>1,2</sup>, Chuyan Zhang <sup>1</sup>, Bin Chen <sup>1,2</sup>, Lusheng Liu <sup>1</sup>, Haozhe Song <sup>1</sup>, Bing Yang <sup>1,2</sup>, Ziwen Zheng <sup>1,2</sup>, Junyao Li <sup>1</sup>, Xin Jiang <sup>1,3,\*</sup> and Nan Huang <sup>1,2,\*</sup>

<sup>1</sup> Shenyang National Laboratory for Materials Science (SYNL), Institute of Metal Research (IMR), Chinese Academy of Sciences (CAS), No. 72 Wenhua Road, Shenyang 110016, China

<sup>2</sup> School of Materials Science and Engineering, University of Science and Technology of China, No. 72 Wenhua Road, Shenyang 110016, China

<sup>3</sup> Institute of Materials Engineering, University of Siegen, No. 9-11 Paul-Bonatz-Str., 57076 Siegen, Germany

\* Correspondence: xjiang@imr.ac.cn (X.J.); nhuang@imr.ac.cn (N.H.)

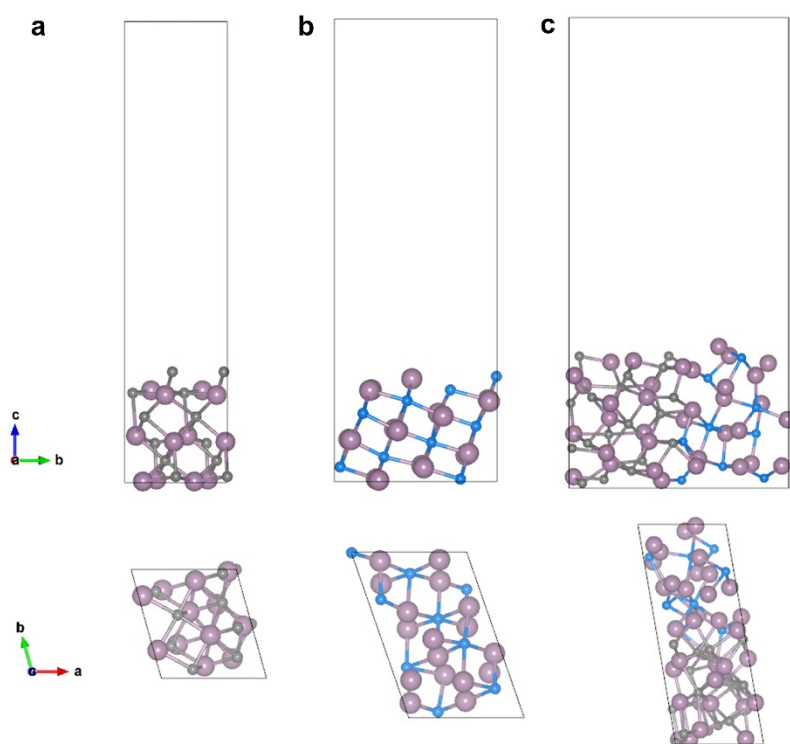

**Figure S1.** Side view (upper panel) and top view (lower panel) for the super cells of (a)  $\text{Mo}_2\text{C}$  (101), (b)  $\text{Mo}_2\text{N}$  (111), and (c)  $\text{Mo}_2\text{C}$  (101)- $\text{Mo}_2\text{N}$  (111) heterostructure.

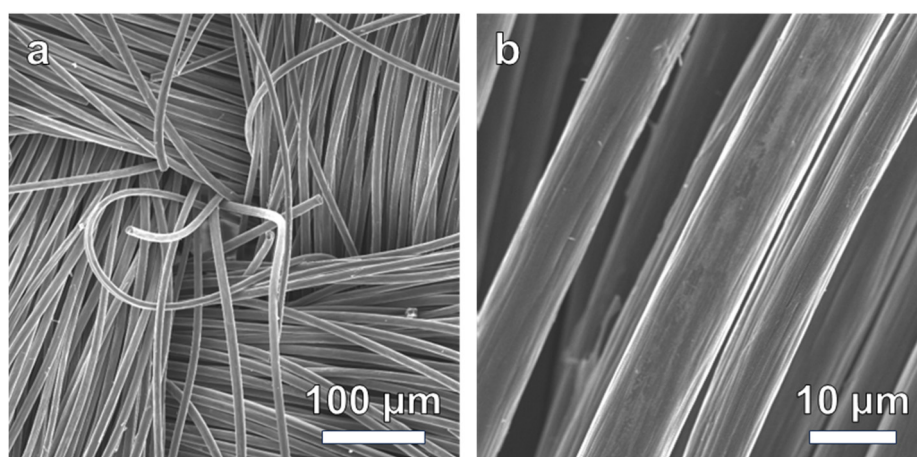

**Figure S2.** (a) Low-magnification and (b) high-magnification SEM images of CC.

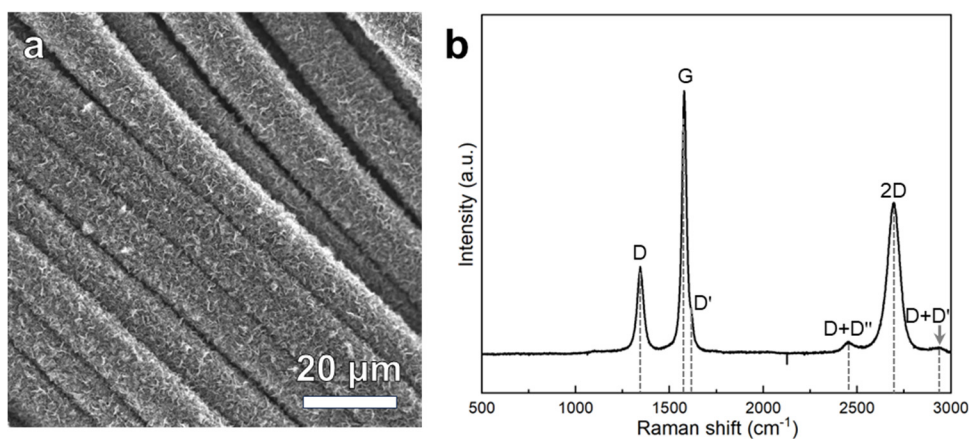

**Figure S3.** (a) SEM image and (b) Raman spectrum of the pristine CNW/D-coated CC.

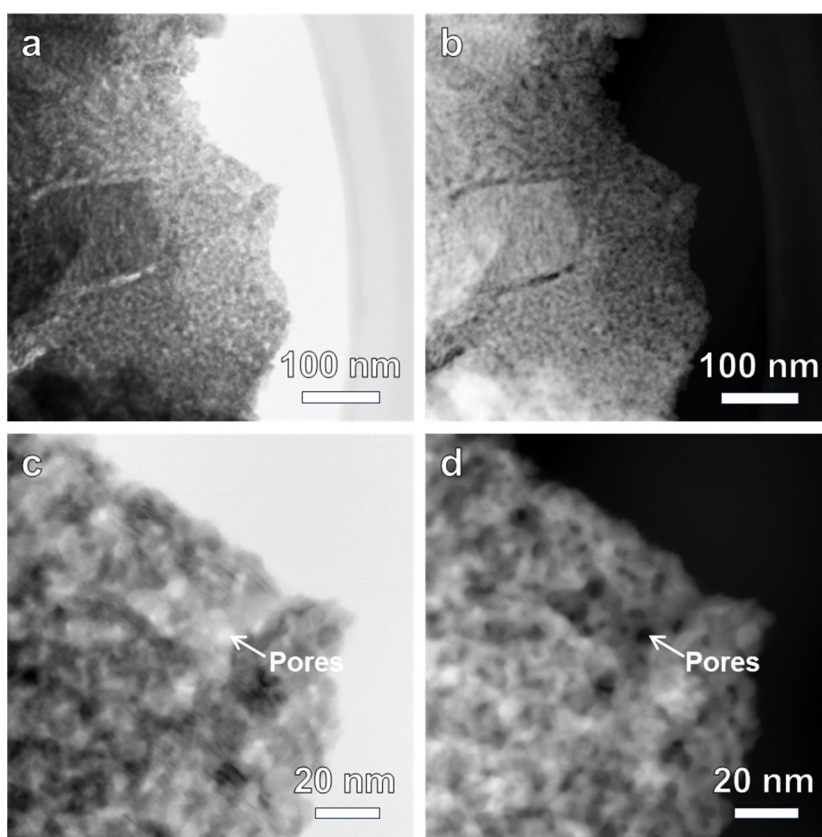

**Figure S4.** (a,c) Bright-field and (b,d) corresponding HAADF TEM images of  $\text{Mo}_2\text{C-Mo}_2\text{N@CNWs/D}$ .

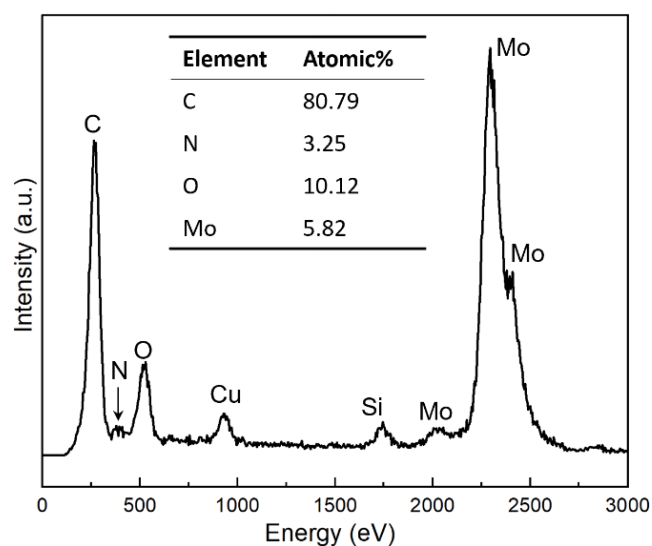

**Figure S5.** EDS spectrum of Mo<sub>2</sub>C-Mo<sub>2</sub>N@CNWs/D.

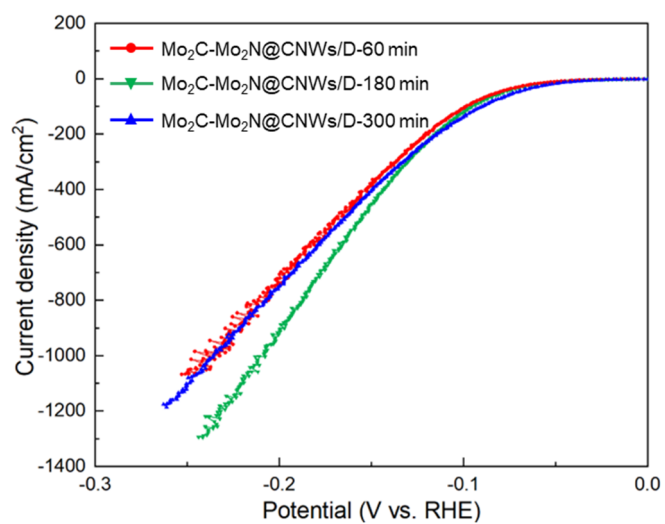

**Figure S6.** Polarization curves of Mo<sub>2</sub>C-Mo<sub>2</sub>N@CNWs/D prepared at 700 °C with the annealing time of 60, 180, and 300 min.

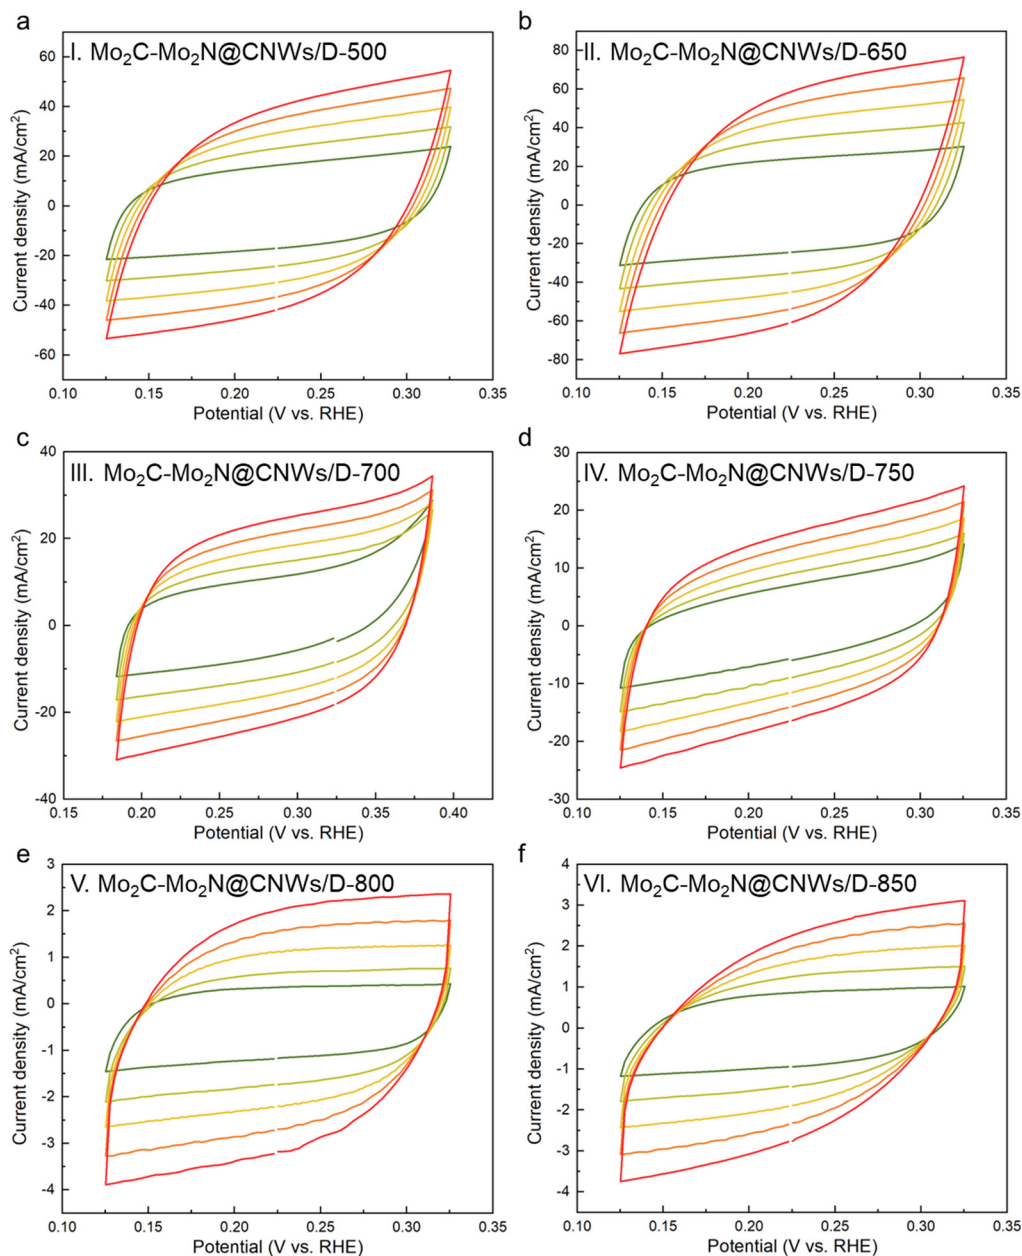

**Figure S7.** CV curves of (a) Mo<sub>2</sub>C-Mo<sub>2</sub>N@CNWs/D-500, (b) Mo<sub>2</sub>C-Mo<sub>2</sub>N@CNWs/D-650, (c) Mo<sub>2</sub>C-Mo<sub>2</sub>N@CNWs/D-700, (d) Mo<sub>2</sub>C-Mo<sub>2</sub>N@CNWs/D-750, (e) Mo<sub>2</sub>C-Mo<sub>2</sub>N@CNWs/D-800, and (f) Mo<sub>2</sub>C-Mo<sub>2</sub>N@CNWs/D-850 at various scan rates ranging from 0.04 to 0.12 V/s.

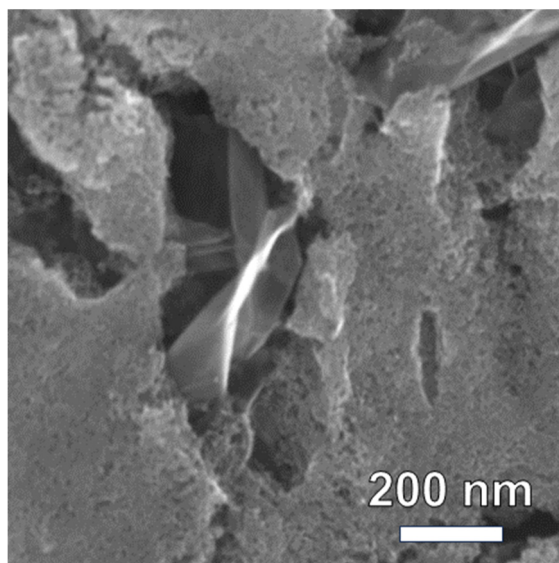

**Figure S8.** SEM image of Mo<sub>2</sub>C-Mo<sub>2</sub>N@CNWs/D-650 after a 24 h HER test at a high current density of 500 mA/cm<sup>2</sup>.

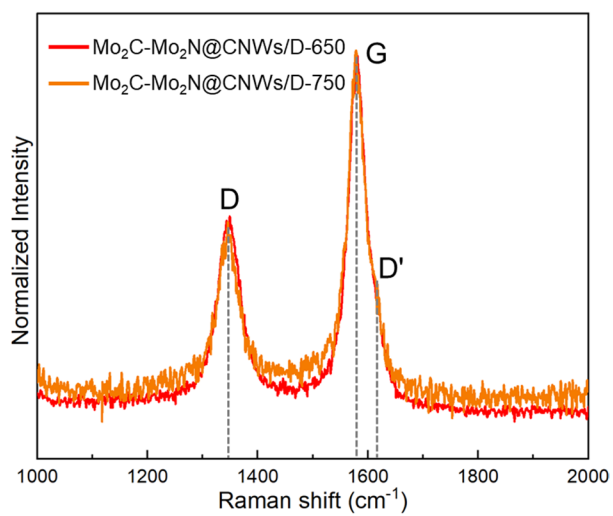

**Figure S9.** Raman spectra of Mo<sub>2</sub>C-Mo<sub>2</sub>N@CNWs/D prepared at 650 and 750 °C.

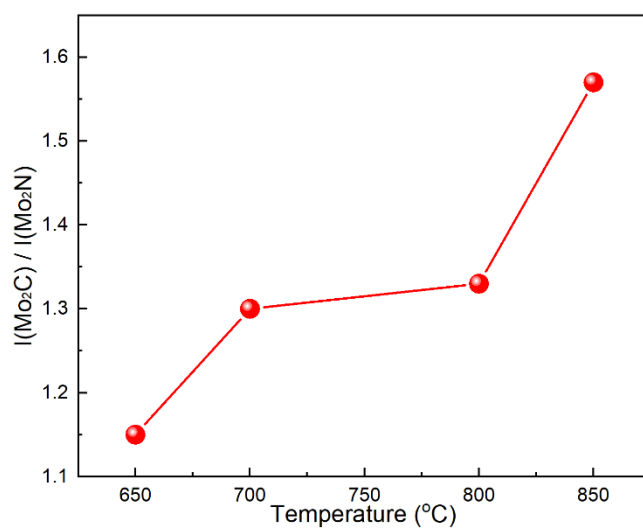

**Figure S10.** The intensity ratio of the  $\text{Mo}_2\text{C}$  (101) peak to the  $\text{Mo}_2\text{N}$  (111) peak in XRD patterns as a function of the temperature.

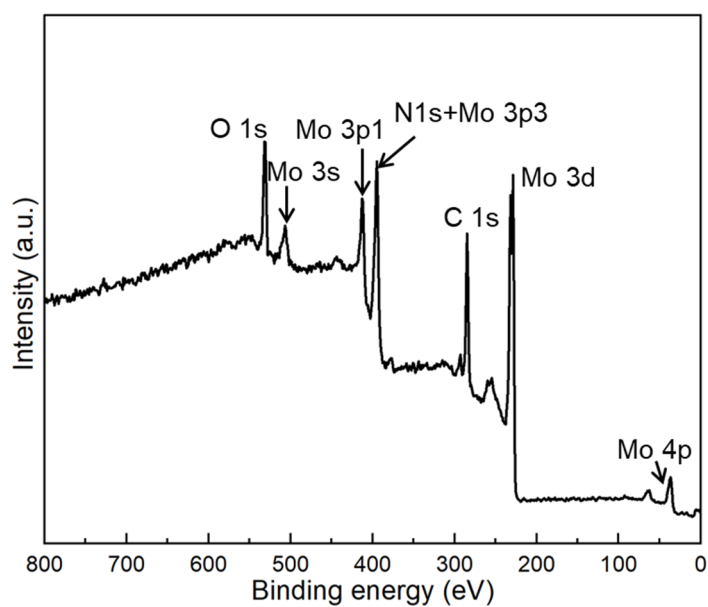

**Figure S11.** XPS survey spectrum of  $\text{Mo}_2\text{C}$ - $\text{Mo}_2\text{N}$ @CNWs/D-650.

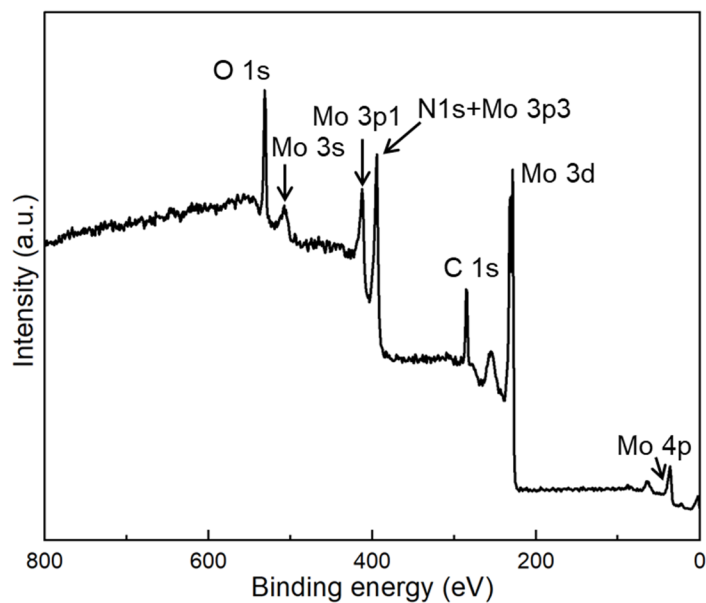

**Figure S12.** XPS survey spectrum of Mo<sub>2</sub>C-Mo<sub>2</sub>N@CNWs/D-650 after HER test.

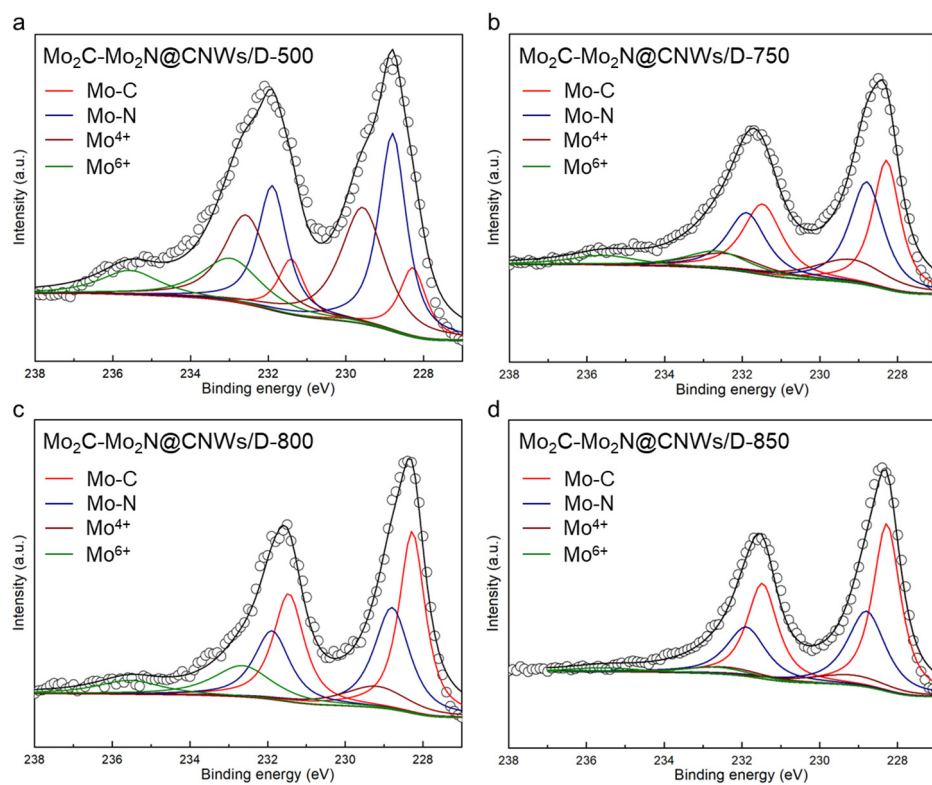

**Figure S13.** High-resolution Mo 3d XPS spectra of (a) Mo<sub>2</sub>C-Mo<sub>2</sub>N@CNWs/D-500, (b) Mo<sub>2</sub>C-Mo<sub>2</sub>N@CNWs/D-750, (c) Mo<sub>2</sub>C-Mo<sub>2</sub>N@CNWs/D-800, and (d) Mo<sub>2</sub>C-

Mo<sub>2</sub>N@CNWs/D-850.

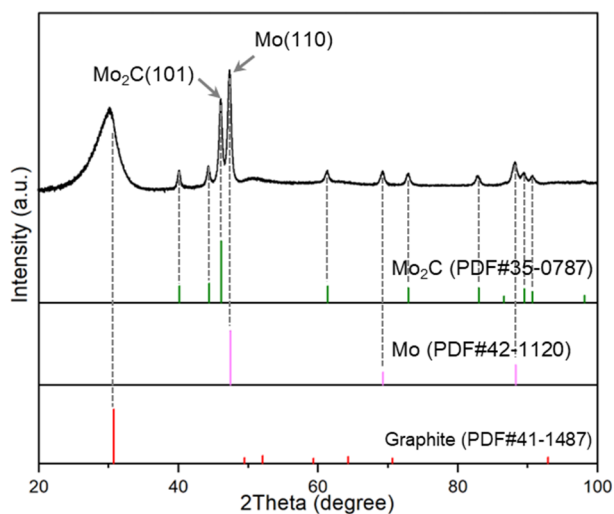

**Figure S14.** XRD pattern of Mo<sub>2</sub>C@CNWs/D-650 prepared on a CC substrate.

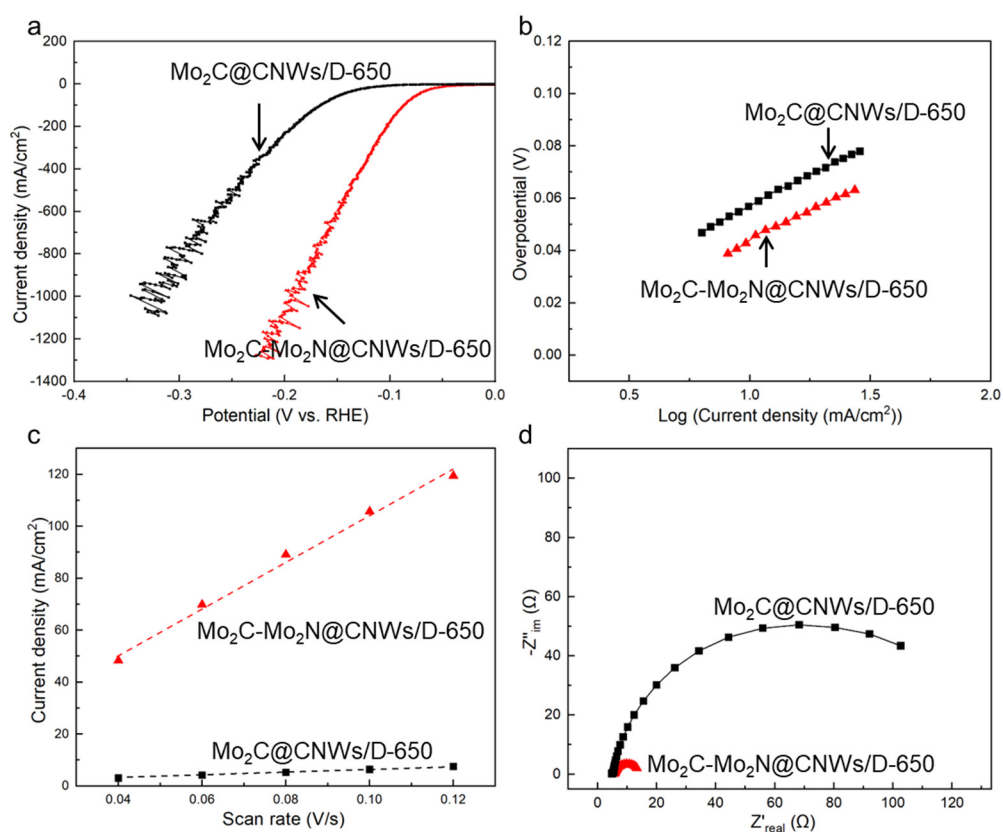

**Figure S15.** Electrocatalytic HER performance of Mo<sub>2</sub>C@CNWs/D-650 in 1 M KOH.

(a) Polarization curves and corresponding (b) Tafel plots. (c) Capacitive current

variation as a function of scan rate from 0.04 to 0.12 V/s. (d) Nyquist plots. The curves of  $\text{Mo}_2\text{C-Mo}_2\text{N@CNWs/D-650}$  are demonstrated as control.

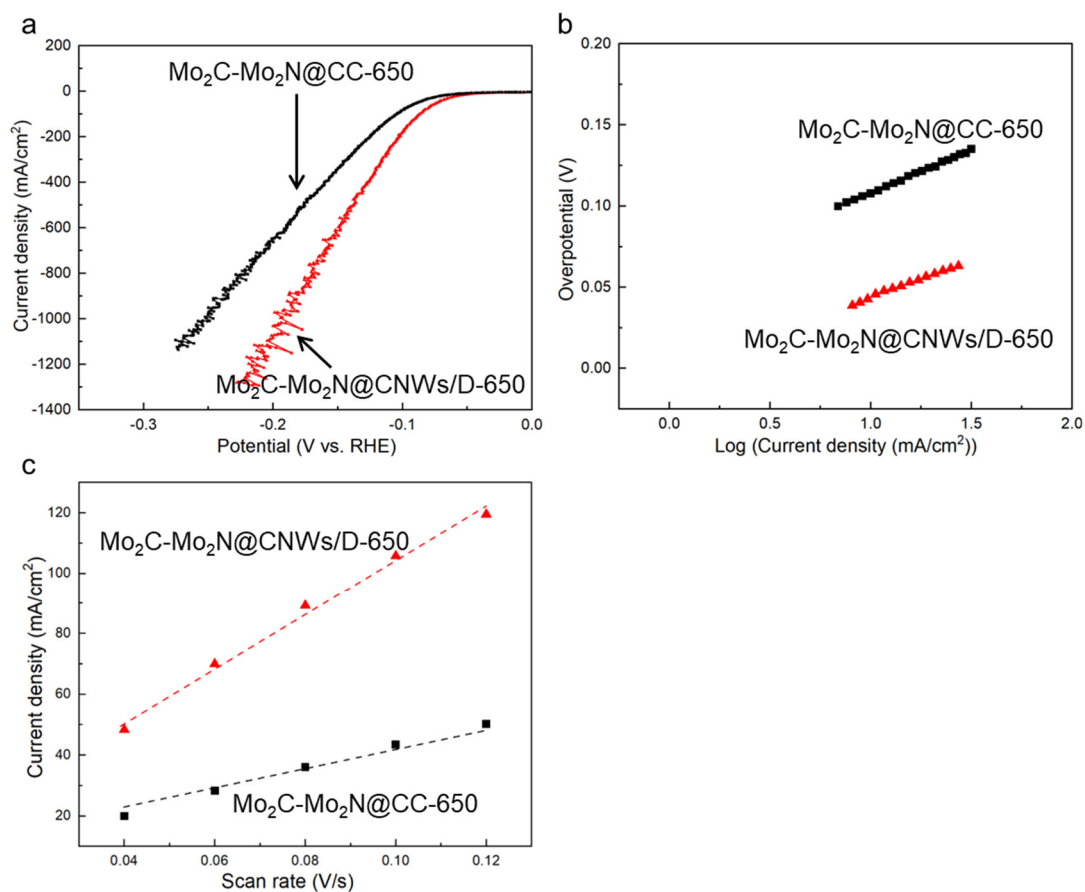

**Figure S16.** Electrocatalytic HER performance of  $\text{Mo}_2\text{C-Mo}_2\text{N@CC-650}$  in 1 M KOH.

(a) Polarization curves and corresponding (b) Tafel plots. (c) Capacitive current variation as a function of scan rate from 0.04 to 0.12 V/s. The curves of  $\text{Mo}_2\text{C-Mo}_2\text{N@CNWs/D-650}$  are demonstrated as control.

**Table S1.** The adsorption energy change of  $H^*$  species ( $\Delta E_{H^*}$ ) and the free energy change of adsorbed  $H^*$  species ( $\Delta G_{H^*}$ ) on different sites of  $Mo_2C$  (101),  $Mo_2N$  (111), and  $Mo_2C$  (101)- $Mo_2N$  (111) heterostructure.

| Species                               | $\Delta E_{H^*}$ (eV) | $\Delta G_{H^*}$ (eV) |
|---------------------------------------|-----------------------|-----------------------|
| $H^*$ on Mo site of $Mo_2C$           | -0.4544               | -0.3178               |
| $H^*$ on Mo site of $Mo_2N$           | -0.9586               | -0.5889               |
| $H^*$ on Mo site of $Mo_2C$ - $Mo_2N$ | -0.2915               | -0.1673               |
| $H^*$ on N site of $Mo_2C$ - $Mo_2N$  | -0.1826               | 0.0913                |
| $H^*$ on C site of $Mo_2C$ - $Mo_2N$  | -0.9137               | -0.6604               |

**Table S2.** Electrocatalytic HER characteristics of  $Mo_2C@CNWs/D-650$  prepared without melamine,  $Mo_2C$ - $Mo_2N@CC-650$  prepared on CC, and  $Mo_2C$ - $Mo_2N@CNWs/D-650$ .

| Samples                      | $\eta_{10}$<br>(mV) | $\eta_{500}$<br>(mV) | $\eta_{1000}$<br>(mV) | Tafel slope<br>(mV/dec) | $R_{ct}$<br>( $\Omega$ ) | Capacitance<br>(mF/cm <sup>2</sup> ) |
|------------------------------|---------------------|----------------------|-----------------------|-------------------------|--------------------------|--------------------------------------|
| $Mo_2C@CNWs/D-650$           | 107.9               | 253.8                | 316.6                 | 52.9                    | 129.42                   | 55                                   |
| $Mo_2C$ - $Mo_2N@CC-650$     | 56.9                | 176.3                | 251.7                 | 47.3                    | 13.94                    | 379                                  |
| $Mo_2C$ - $Mo_2N@CNWs/D-650$ | 42.8                | 137.8                | 194.4                 | 45.6                    | 8.59                     | 891                                  |
